# Supplementary material
Source: PubMed Central journal article supplement (PMC2786000)
Supplement: pp.109.146514_1.pdf [file pp.109.146514_1.pdf]

1 **Supplemental Figure legends**

2 **Supplemental Figure 1**

3 Relationship between CO<sub>2</sub> assimilation rate measured at 1500 μmol photons m<sup>-2</sup> s<sup>-1</sup> and 380 μL L<sup>-1</sup> CO<sub>2</sub>  
4 concentration ( $A_{380}$ ) and the Rubisco activase contents at several leaf temperatures in wild type (triangles)  
5 and antisense lines (circles or squares). Plants were grown at 20/15°C (a, c) or 30/25°C (b, d).  
6

7 **Supplemental Figure 2**

8 Relationship between Rubisco activation state at 1500 μmol photons m<sup>-2</sup> s<sup>-1</sup> and 380 μL L<sup>-1</sup> CO<sub>2</sub>  
9 concentration and Rubisco activase contents at several leaf temperatures in wild type (triangles) and  
10 antisense lines (circles or squares). Plants were grown at 20/15°C (a, c) or 30/25°C (b, d).  
11

12 **Supplemental Figure 3**

13 CO<sub>2</sub> assimilation rate at 1500 μmol photons m<sup>-2</sup> s<sup>-1</sup> and 380 μL L<sup>-1</sup> CO<sub>2</sub> concentration ( $A_{380}$ ) and the  
14 Rubisco activation state as a function of the ratio of Activase/Rubisco contents in wild type (triangles) and  
15 antisense lines (circles). Plants were grown at 20/15°C (closed symbols) or 30/25°C (open symbols).  $A_{380}$   
16 and Rubisco activation state was shown at leaf temperatures of 25°C (a, c) and 40°C (b, d).  
17

18 **Supplemental Figure 4**

19 CO<sub>2</sub> response of CO<sub>2</sub> assimilation rate ( $A$ ) measured at 25 & 40°C and 1500 μmol photons m<sup>-2</sup> s<sup>-1</sup> in wild  
20 type (a), plants with intermediate Rubisco activase contents (b) and plants with low Rubisco activase  
21 contents (c) grown at 20/15°C. The explanation of plant classification is given in Table 1.  $A$  at 25°C is  
22 shown as closed circles, whereas  $A$  at 40°C is shown as open circles. Rubisco-limited  $A$  ( $A_c$ : solid line) was  
23 estimated from Eqn 1 in Materials & Methods, whereas RuBP regeneration-limited  $A$  ( $A_r$ : dotted line) was  
24 estimated from Eqn 2 in Materials & Methods. Electron transport rate from chlorophyll fluorescence ( $J_f$ ) as  
25 a function of chloroplast CO<sub>2</sub> concentration ( $C_c$ ) at 25 & 40°C in wild type (d), plants with intermediate  
26 Rubisco activase contents (e) and plants with low Rubisco activase contents (f) in plants grown at 20/15°C.  
27  $J_f$  at 25°C is shown as closed symbols, whereas  $J_f$  at 40°C is shown as an open symbol. Arrows show  
28 measurements made at 380 μL L<sup>-1</sup> CO<sub>2</sub> concentration. Data represent means ±SE, n = 4.  
29

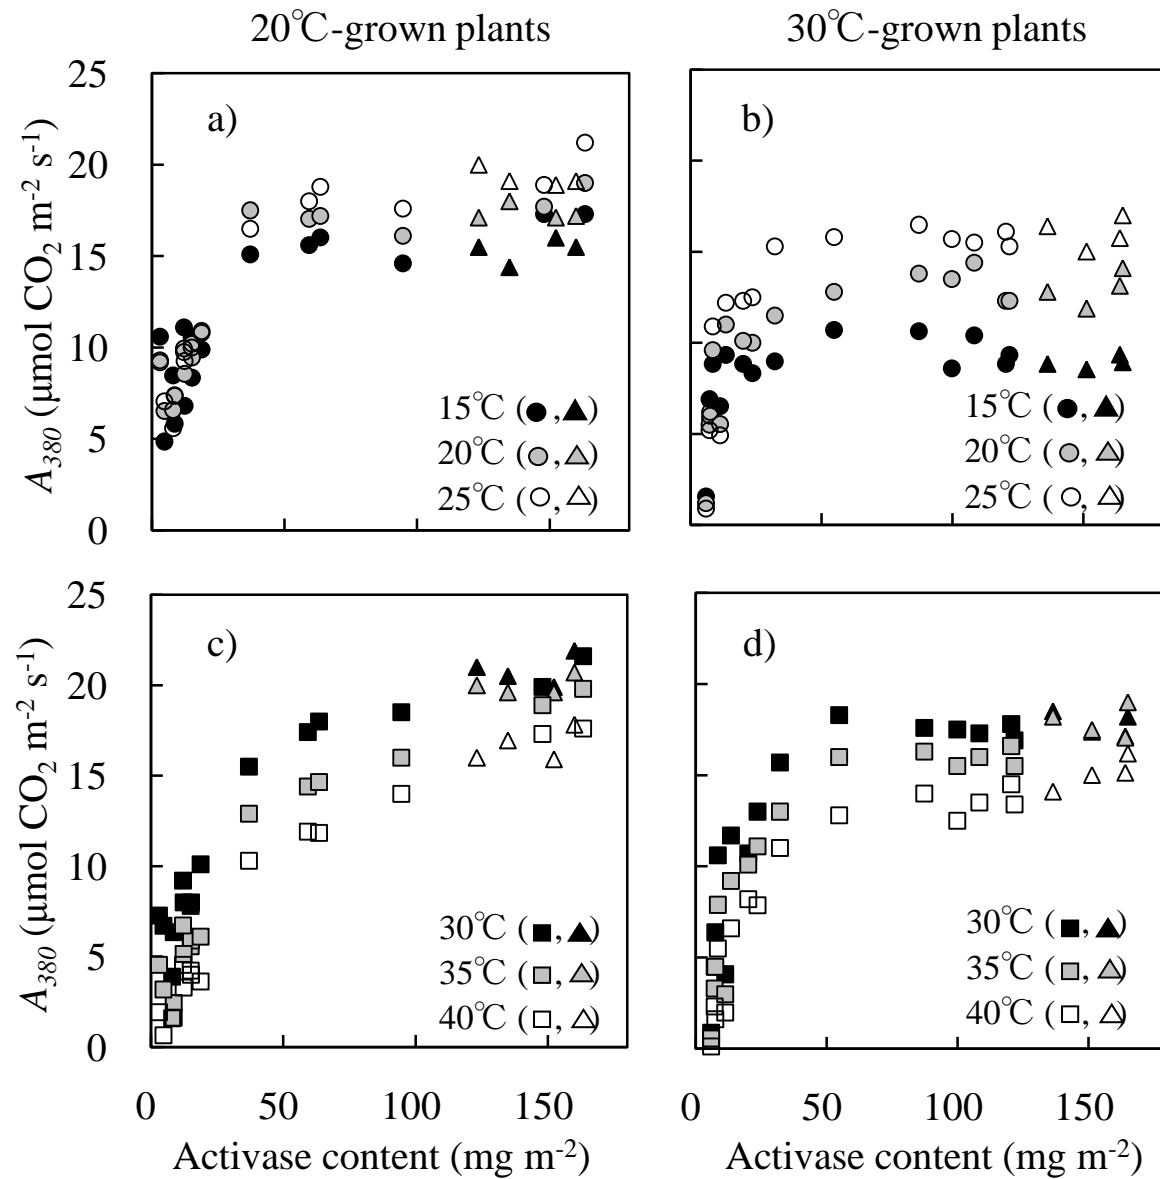

(Supplemental Figure 1) Relationship between CO<sub>2</sub> assimilation rate measured at 1500  $\mu\text{mol photons m}^{-2} \text{ s}^{-1}$  and 380  $\mu\text{L L}^{-1}$  CO<sub>2</sub> concentration ( $A_{380}$ ) and the Rubisco activase contents at several leaf temperatures in wild type (triangles) and antisense lines (circles or squares). Plants were grown at 20/15° C (a, c) or 30/25° C (b, d).

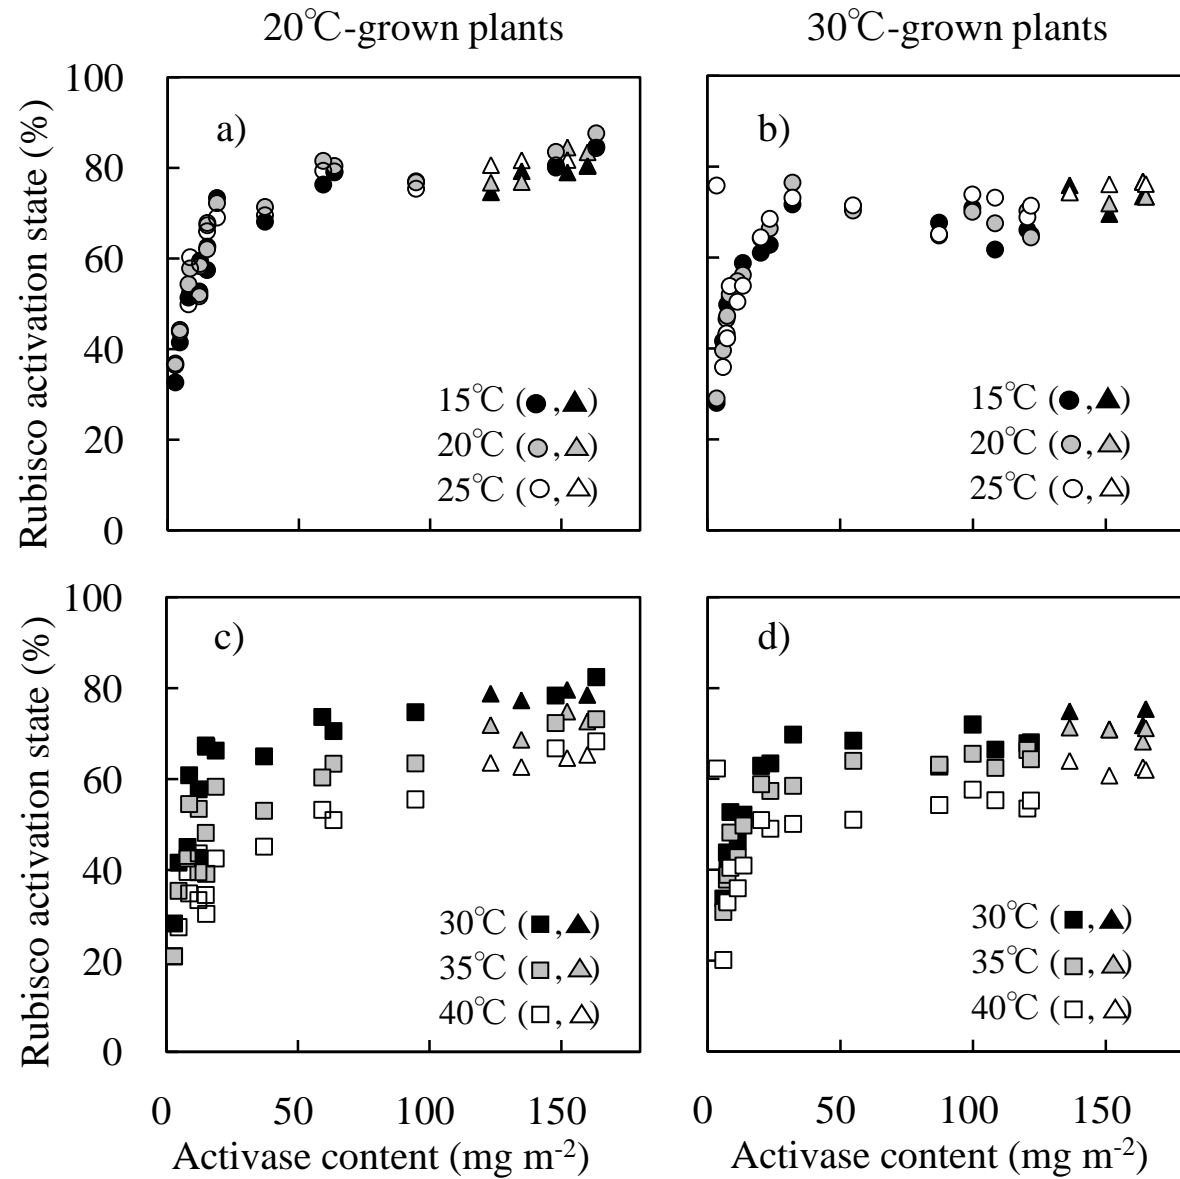

(Supplemental Figure 2) Relationship between Rubisco activation state at  $1500 \mu\text{mol photons m}^{-2} \text{s}^{-1}$  and  $380 \mu\text{L L}^{-1} \text{CO}_2$  concentration and Rubisco activase contents at several leaf temperatures in wild type (triangles) and antisense lines (circles or squares). Plants were grown at 20/15° C (a, c) or 30/25° C (b, d).

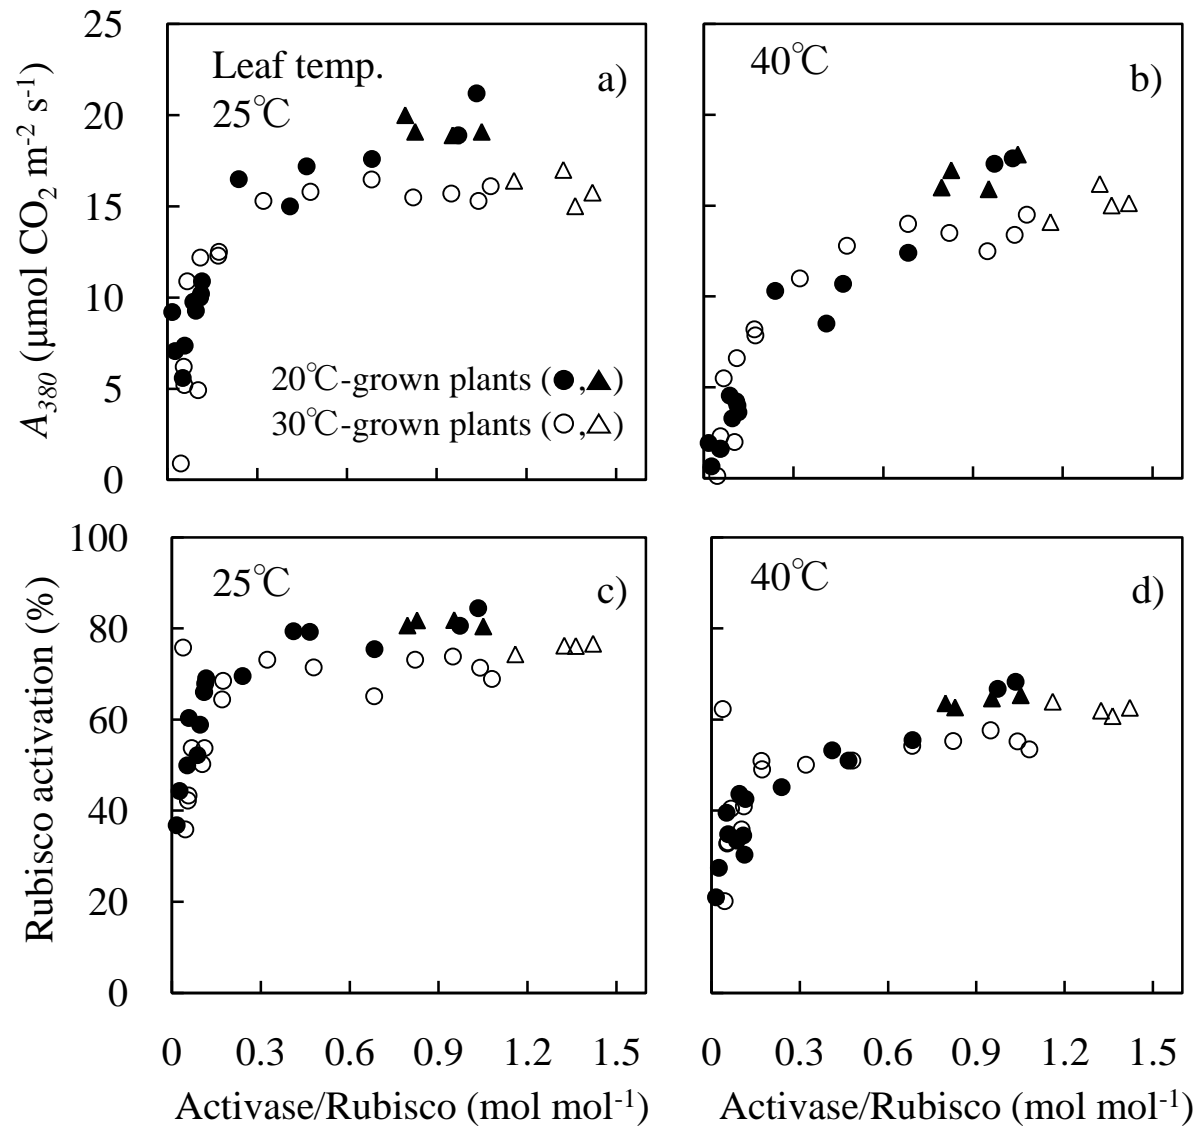

(Supplemental Figure 3)  $\text{CO}_2$  assimilation rate at  $1500 \mu\text{mol photons m}^{-2} \text{ s}^{-1}$  and  $380 \mu\text{L L}^{-1}$   $\text{CO}_2$  concentration ( $A_{380}$ ) and the Rubisco activation state as a function of the ratio of Activase/Rubisco contents in wild type (triangles) and antisense lines (circles). Plants were grown at  $20/15^\circ \text{C}$  (closed symbols) or  $30/25^\circ \text{C}$  (open symbols).  $A_{380}$  and Rubisco activation state was shown at leaf temperatures of  $25^\circ \text{C}$  (a, c) and  $40^\circ \text{C}$  (b, d).

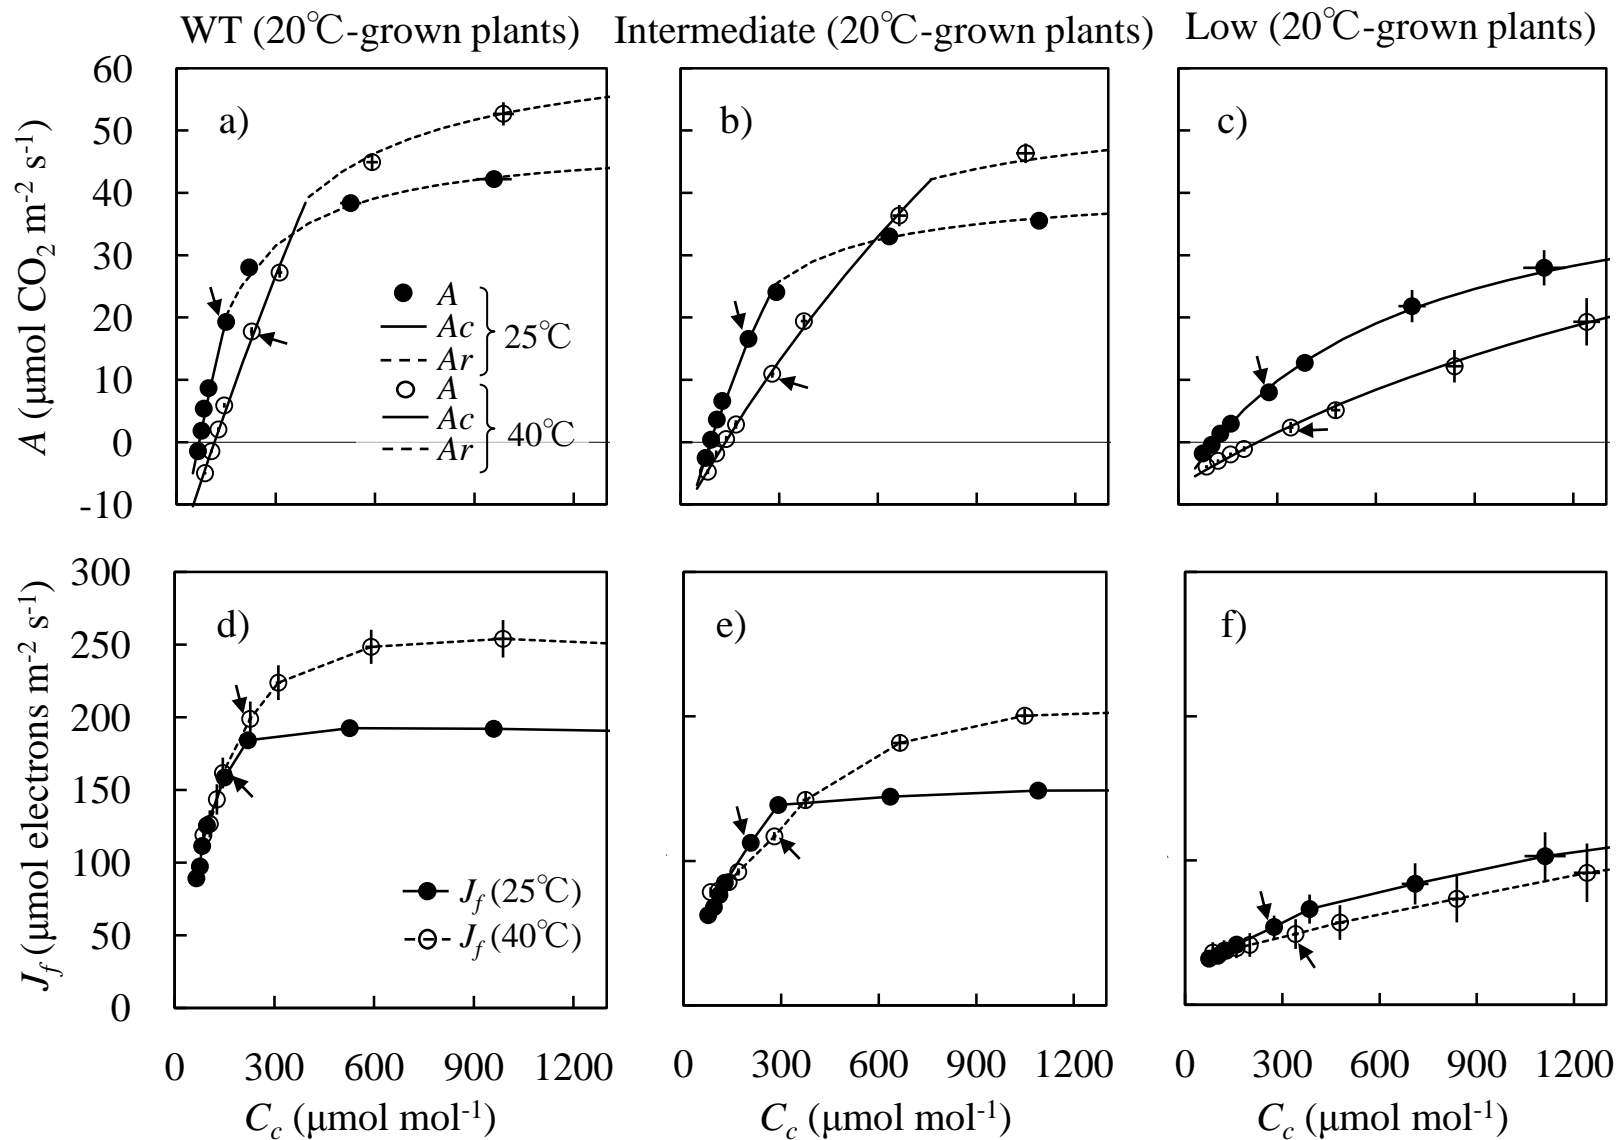

(Supplemental Figure 4) CO<sub>2</sub> response of CO<sub>2</sub> assimilation rate ( $A$ ) measured at 25 & 40° C and 1500  $\mu\text{mol photons m}^{-2} \text{ s}^{-1}$  in wild type (a), plants with intermediate Rubisco activase contents (b) and plants with low Rubisco activase contents (c) grown at 20/15° C. The explanation of plant classification is given in Table 1.  $A$  at 25° C is shown as closed circles, whereas  $A$  at 40° C is shown as open circles. Rubisco-limited  $A$  ( $A_c$ ; solid line) was estimated from Eqn 1 in Materials & Methods, whereas RuBP regeneration-limited  $A$  ( $A_r$ ; dotted line) was estimated from Eqn 2 in Materials & Methods. Electron transport rate from chlorophyll fluorescence ( $J_f$ ) as a function of chloroplast CO<sub>2</sub> concentration ( $C_c$ ) at 25 & 40° C in wild type (d), plants with intermediate Rubisco activase contents (e) and plants with low Rubisco activase contents (f) in plants grown at 20/15° C.  $J_f$  at 25° C is shown as closed symbols, whereas  $J_f$  at 40° C is shown as open symbol. Arrows show measurements made at 380  $\mu\text{L L}^{-1}$  CO<sub>2</sub> concentration. Data represent means  $\pm$  SE,  $n = 4$ .
